# Supplementary material
Source: Springer Nature journal article supplement (https://www.springermedizin.de/resource/supplementary/12936_2011_1914_MOESM4_ESM.pdf/9542052)

A. Source of testing

(N=698 people tested)

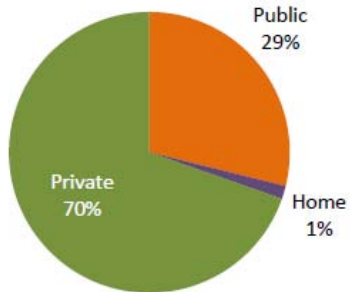

B. Source of anti-malarials

(N=387 anti-malarials)

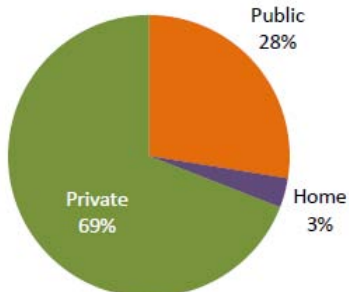

C. Source of cocktails containing an anti-malarial

(N=200 people treated)

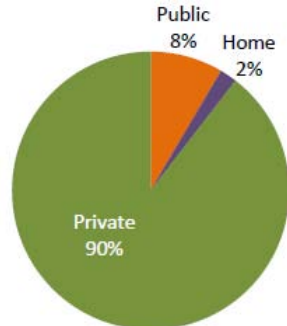

D. Source of cocktails with no identifiable anti-malarial

(N=1,188 people treated)

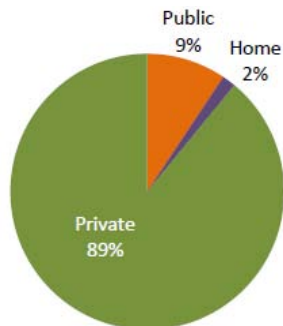

Supplement: MOESM4 [file 9542052]
